# Supplementary material
Source: PubMed Central journal article supplement (PMC5826847)
Supplement: NIHMS930442-supplement-Supp_FigS1-11.pdf [file NIHMS930442-supplement-Supp_FigS1-11.pdf]

## **Supplemental Material**

*Contents:* Supplemental Figures S1-S11

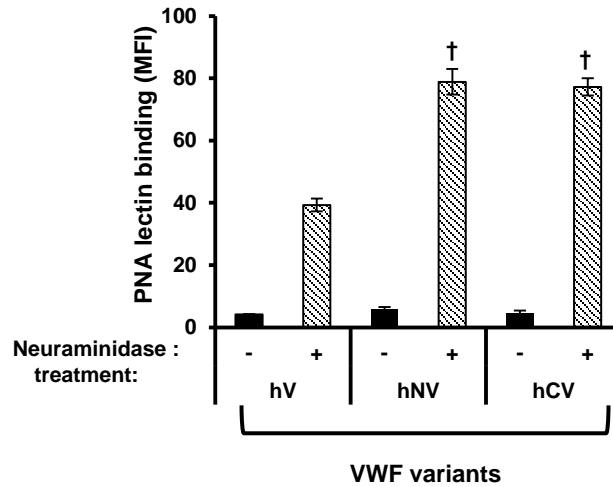

**Figure S1. Peanut agglutinin binding to immobilized VWF:** 10µg/mL VWF proteins were captured on anti-VWF beads. 200U/ml *A. ureafaciens* α2-3,6,8,9 Neuraminidase A (New England Biolabs) was added in some cases for 1h at 37°C to remove sialic acids and expose the T-antigen (Galβ1,3GalNAc) prior to capture on anti-VWF beads. Peanut agglutinin-FITC (1:100 dilution from Vector labs) binding to beads was then measured. This lectin binds the Galβ1,3GalNAcα epitope on desialylated O-linked glycans. Insertion of mucin-repeat in hNV and hCV doubles the amount of Peanut agglutinin-FITC binding. Equivalent amounts of total VWF was captured in each case. Overall, the CD43 mucin insert increases the prevalence of O-glycans on VWF. †  $P < 0.05$  with respect to hV protein.

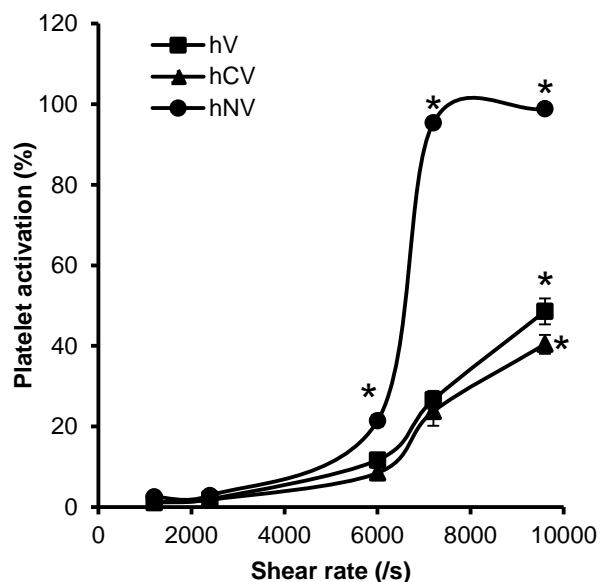

**Figure S2. SIPAct studies under different shear rates:** 1:50 diluted platelet rich plasma ( $\sim 6-10 \times 10^6$  platelets/ml) was shear mixed with 10 $\mu$ g/mL hV, hCV or hNV for 5 min. at various shear rates (1000-9600/s) using a cone-plate viscometer. % platelet activation was quantified based on Annexin-V binding using flow cytometry. Here, platelet activation (%) measures the fraction of platelets with exposed phosphatidylserine. Such platelets bind high amounts of FITC-conjugated Annexin-V. \* $P < 0.05$  with respect to all other treatments. All proteins augment platelet activation only above 6000/s. The magnitude of platelet activation is greater upon usage of hNV.

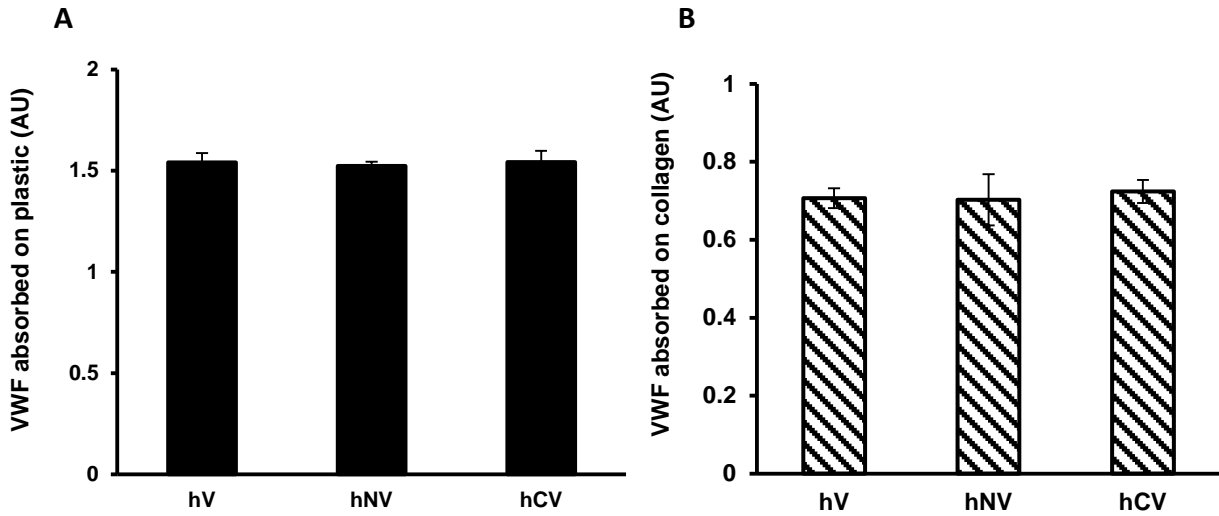

**Figure S3. VWF-collagen binding.** Petri dishes used for the microfluidics studies were either left uncoated (panel A) or coated with 20 $\mu$ g/mL equine type I collagen (panel B) overnight at 4°C. The dishes were then washed. In panel A, 10 $\mu$ g/mL VWF was added to the dishes at room temperature for 1h prior to blocking with 1% BSA. In panel B, the dishes were first blocked with BSA prior to the addition of 10 $\mu$ g/mL VWF for another hour. VWF bound to these substrates was quantified using horse-radish peroxidase (HRP) conjugated polyclonal anti VWF Ab (Dako) and o-phenylenediamine (OPD) substrate. All VWF constructs bind plastic and collagen to an equal extent.

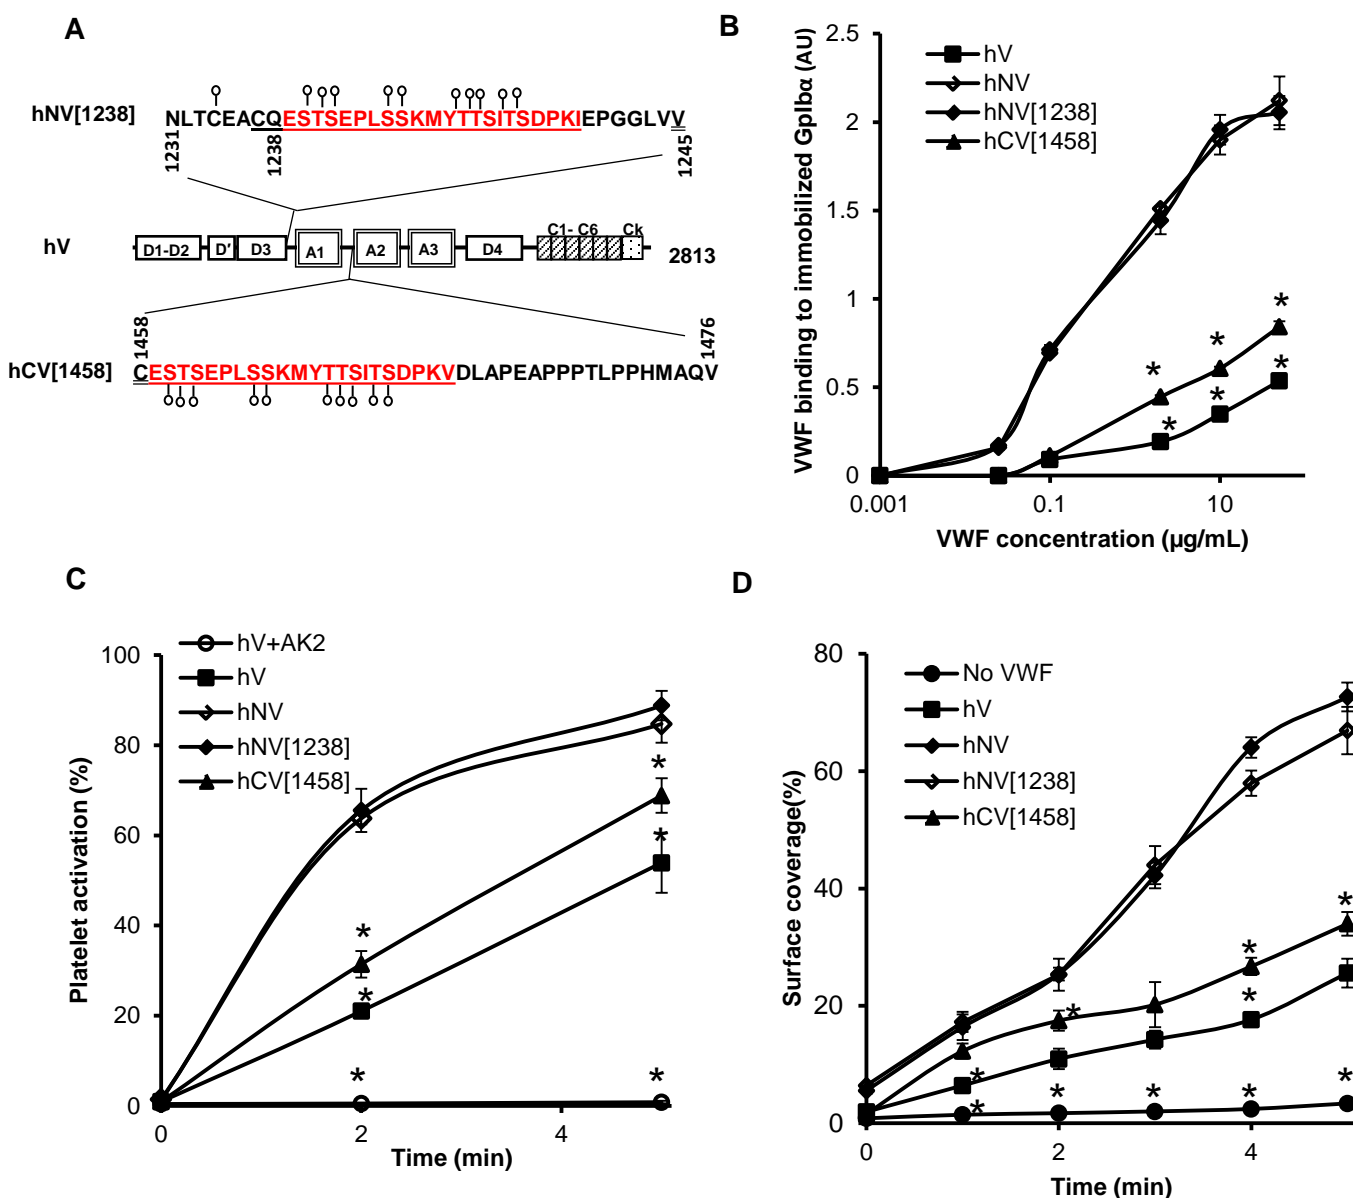

**Figure S4. Functional studies with human VWF containing mucin-inserts following aa1238 at the N-terminus of VWF-A1 and aa1458 at the C-terminus of A1.** **A.** The 22 amino acid mucin-insert from human CD43 (underlined) was inserted after aa1238 to generate the VWF-variant 'hNV[1238]'. Insertion of the same sequence between Cys1458 and Asp1459 resulted in 'hCV[1458]'. **B.** Binding of different concentrations of VWF variants to 4  $\mu\text{g/mL}$  immobilized Gplb $\alpha$ -Fc in microtiter plates. **C.** SIPAct studies were performed by shearing  $10^7/\text{mL}$  CD31-labeled washed platelets with  $10\mu\text{g/mL}$  recombinant VWF variants at  $9600\text{s}^{-1}$  ( $100\text{ dyn/cm}^2$  shear stress) in a cone-plate viscometer. AK-2 is an anti-Gplb $\alpha$  blocking mAb. **D.**  $10^8/\text{mL}$  BCECF-labeled fluorescent human platelets were resuspended in plasma-free blood supplemented with  $10\mu\text{g/mL}$  recombinant human VWF variants. The mixture was perfused over equine collagen bearing substrates for 5 min at a wall shear rate of  $1000\text{ s}^{-1}$  (Shear stress of  $40\text{ dyn/cm}^2$ ). Thrombus formation quantified the percentage of substrate covered by platelets. Control runs were plasma-free without addition of VWF. \* $P < 0.05$  with respect to all other treatments. hNV[1238] function was very similar to hNV, and it displayed significantly higher binding to platelets compared to either normal VWF (hV) or mutant with C-terminal mucin insert (hCV[1458]).

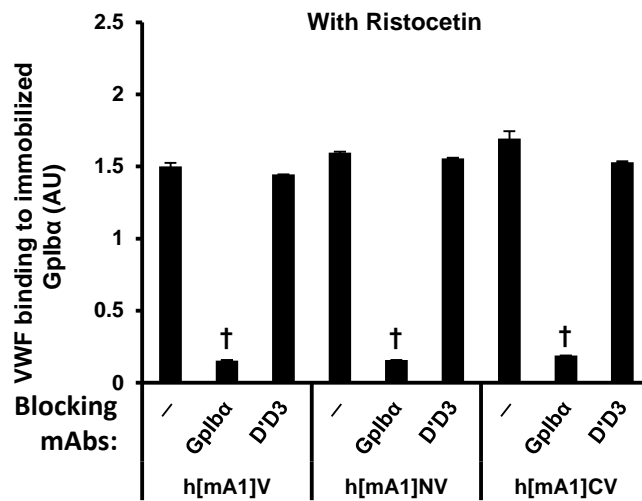

**Figure S5. Chimeric VWF binding to Gplbα in the presence of ristocetin.** 4 µg/ml Gplbα-Fc was immobilized in microwell plates. 10µg/ml chimeric VWF variants were added in the absence or presence of 20 µg/mL blocking antibody (AK2 for GPIbα or DD3.1 for VWF-D'D3) and 1.5 mg/mL ristocetin. VWF binding was quantified using horse-radish peroxidase (HRP) conjugated polyclonal anti-VWF Ab (Dako) and OPD substrate. All data are from 3-4 independent runs with each run having 2-3 repeats. †  $P < 0.05$  with respect to all other treatments.

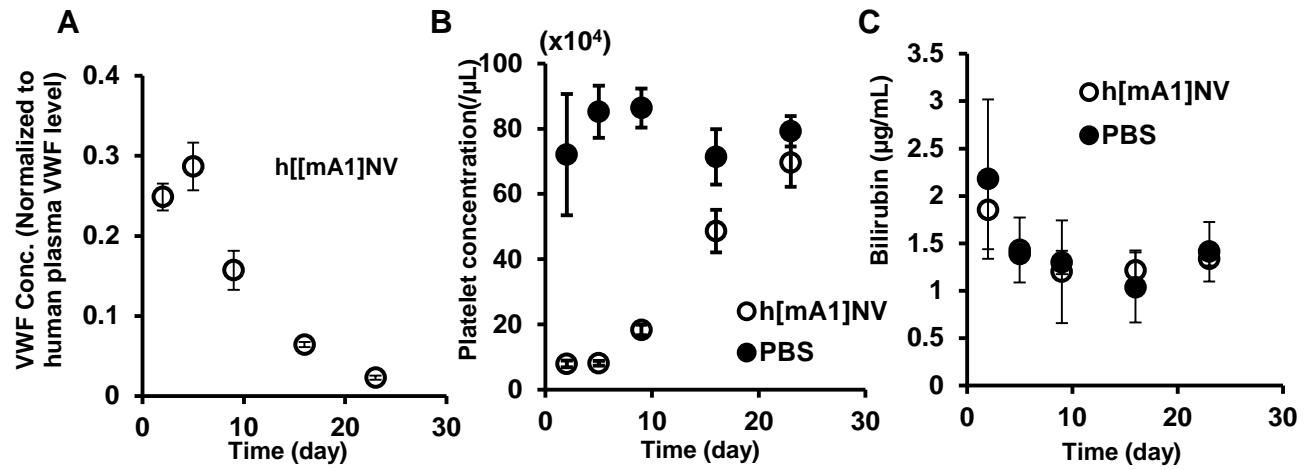

**Figure S6. Time course of VWF expression and platelet counts following h[mA1]NV hydrodynamic injection.** Hydrodynamic injection was performed either with vector carrying h[mA1]NV or PBS/vehicle control (protocol in Fig. 5, main manuscript). Various measurements were made at defined times: **A:** Chimeric VWF concentrations in mouse plasma measured with respect to human VWF standards prepared by pooling plasma from 5 healthy donors; **B:** Platelet counts; **C:** Bilirubin level. Platelet concentration was depressed for 7-10 days. Plasma bilirubin levels did not change dramatically. All mice recovered normally at the end.

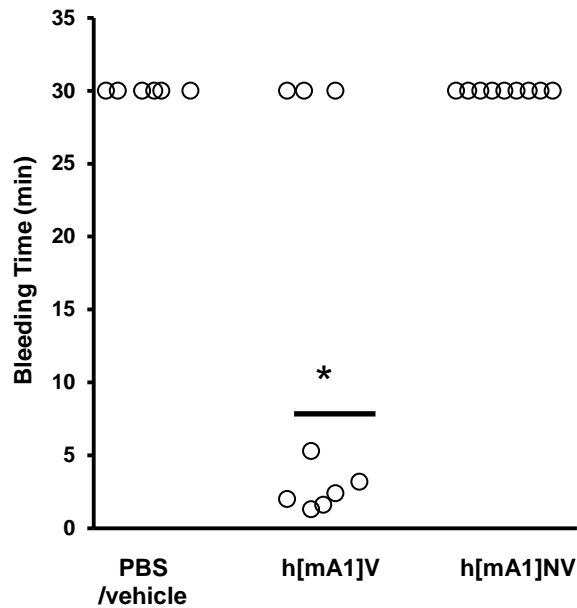

**Figure S7. Tail bleeding time.** Bleeding time was measured from the moment of tail transection until first arrest of bleeding. Observations were stopped at 30min when bleeding did not cease. h[mA1]V typically corrected bleeding defect observed in VWF<sup>-/-</sup> (PBS/vehicle injection). Bleeding was not corrected in 3/9 mice perhaps due to variable protein expression following hydrodynamic injection. Bleeding in h[mA1]NV was unabated, typically at levels greater than even the vehicle/PBS VWF<sup>-/-</sup> mouse. \*  $P < 0.05$  with respect to all other treatments.

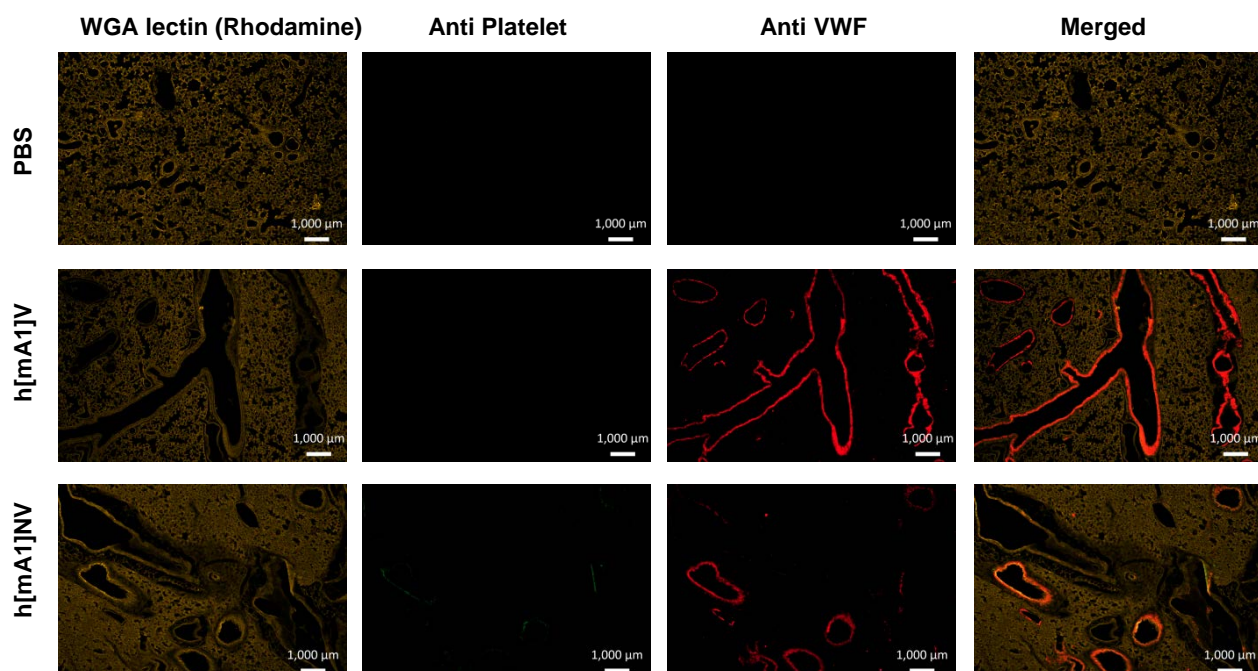

**Figure S8. Immunohistochemical staining of lung section.** Besides the liver, hydrodynamic injection of h[mA1]V and h[mA1]NV also resulted in protein expression in lung (third column), though there was no platelet accumulation in this organ (second column). All images were captured identically to Fig. 5 (main manuscript).

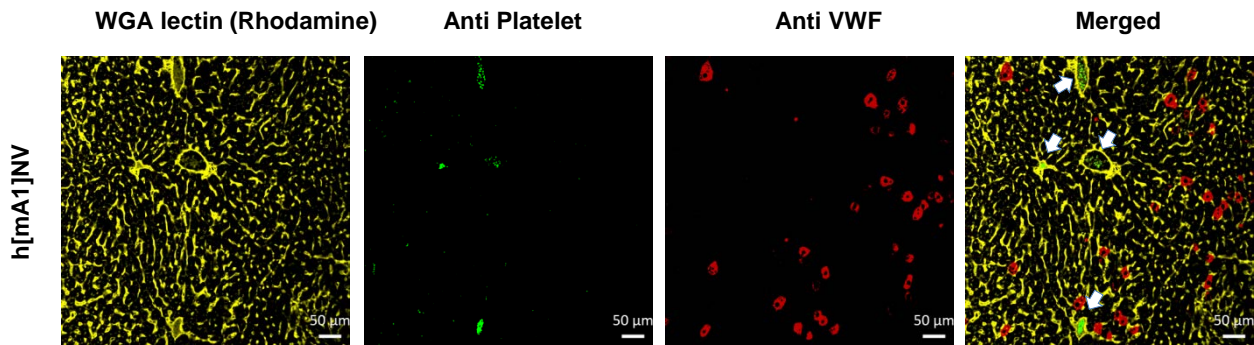

**Figure S9. VWF expression and platelet thrombosis in liver.** Additional examples of thrombosis (white arrow) in the liver sections upon h[mA1]NV hydrodynamic injection. All sections were prepared following perfusion fixation. Methods and results are same as Fig. 5 (main manuscript).

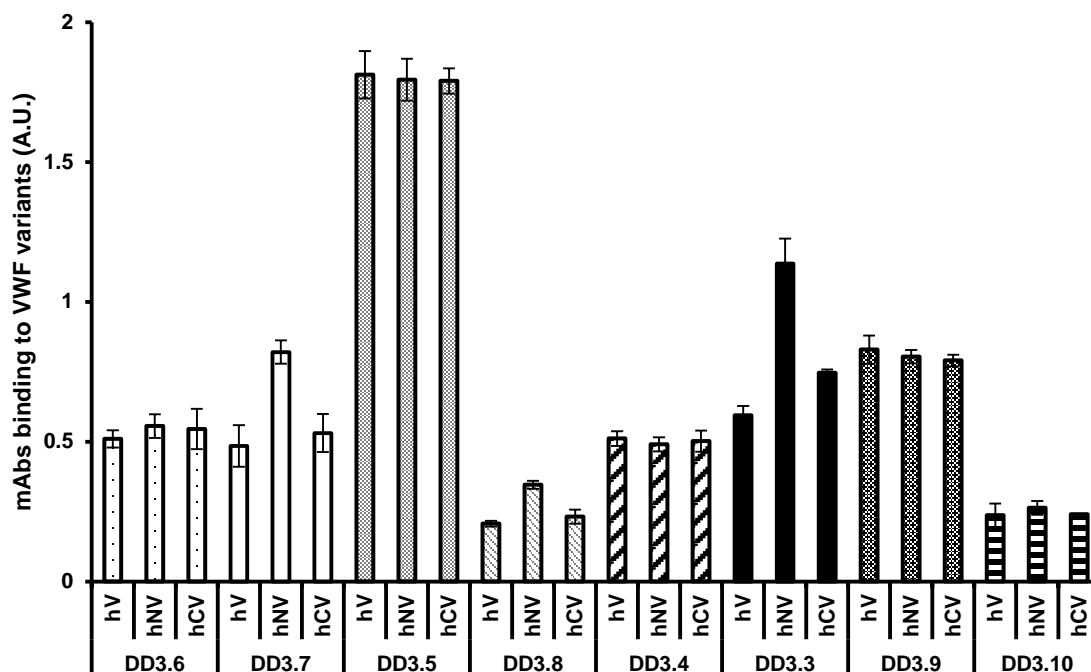

**Figure S10. Conformational sensitive mAb screening.** 10 $\mu$ g/mL human VWF variants (hV, hNV or hCV) were physisorbed on 96-well plates overnight. Following blocking, various anti-D'D3 clones were added to the wells for 30min using standard ELISA methods. The extent of mAb binding to absorbed human VWF variants was measured using goat-anti-mouse HRP to identify anti-D'D3 mAbs that bind differentially to the immobilized proteins. DD3.3 reproducibly bound hNV better than hCV or hV.

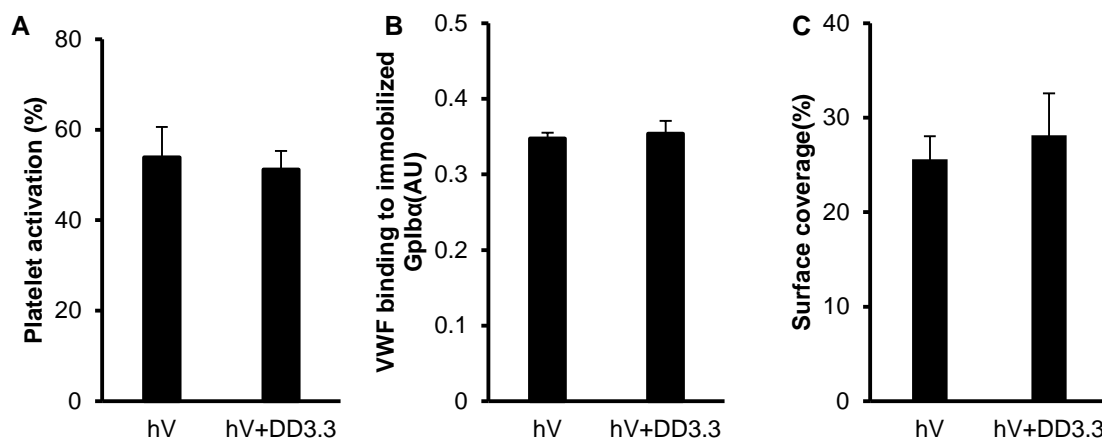

**Figure S11. DD3.3 is a non-function blocking mAb.** Studies were performed to confirm that DD3.3 does not block shear-induced platelet activation (SIPA, panel **A**), VWF binding to immobilized Gplb $\alpha$ -Fc in ELISA (panel **B**) or thrombus formation under shear (panel **C**). In all studies, 20 $\mu$ g/ml DD3.3 antibody was added to VWF at least 10 min prior to the functional assay. All experiments followed protocols described in the main manuscript.
